# Supplementary material for: A Spatially Guided Machine-Learning Method to Classify and Quantify Glomerular Patterns of Injury in Histology Images
Source: J Imaging. 2023 Oct 11;9(10):220. doi: 10.3390/jimaging9100220 (PMC10607091; doi:10.3390/jimaging9100220)
Supplement: Supplementary file 1 [file jimaging-09-00220-s001.zip]

Archive with 4 entries (4 files):
- Supplementary Figure S1.pdf
- Supplementary Figure S2.pdf
- Supplementary Table S1.pdf
- Supplementary Tables S2-S3.pdf
